# Supplementary material for: The history and evolution of the Denisovan-EPAS1 haplotype in Tibetans
Source: PubMed Central journal article supplement — Proc Natl Acad Sci U S A. 2021 May 28;118(22):e2020803118. doi: 10.1073/pnas.2020803118 (PMC8179186; doi:10.1073/pnas.2020803118), 2021-05-28
Supplement: pnas.2020803118.sapp.pdf [file pnas.2020803118.sapp.pdf]

# Supplementary Information Appendix

## Methods

### ABBA-BABA ( $D$ statistics) distribution

To reject the hypothesis that the Tibetan *EPAS1*-haplotype was from Neanderthals, we calculated the distribution of  $D$  statistics of the form  $D(\text{Denisovan, Altai Neanderthal, Vindija Neanderthal, Human-Chimp Ancestor})$  using non-overlapping 32.7-kb windows across the genome (excluding telomeres and centromeres). We chose 32.7kb because this is the length of the haplotype identified in Huerta-Sanchez et al. (2014). We removed archaic sites that had low genotype quality score ( $<40$ ) and low mapping quality ( $<30$ ). Within each window, we used two methods of computing the  $D$  statistic (Durand et al. 2011(1)). First, we randomly sampled an allele from each of the archaic human haplotypes at each side to find sites that matched the ABBA or BABA allele pattern. Second, we used the equation that incorporates allele frequencies to estimate the  $D$ -statistic for windows with few ABBA and BABA sites. Using this method, we calculated the allele frequency of the derived allele for each individual (1, 0.5, or 0 for 2, 1 or 0 copies of the derived allele respectively) and used those frequencies to make the calculations. The values of  $D$  statistic obtained across the genome were shown as a density distribution curve in Figure 2b.

Similarly, we computed the value of  $D(\text{Denisovan, Neanderthal, Tibetan, Chimp})$  at the 32.7kb region in *EPAS1* (chr2:46,567,916:46,600,661, hg19) using the allele frequencies of derived alleles in each population, with Tibetan population being a joined dataset of 78 individuals (40 from Huerta-Sanchez et al. 2014 and 38 from Lu et al. 2016). Using Altai or Vindija individual as Neanderthal yielded the same  $D$  statistic value, and we show it as a red solid arrow in Figure 2b. We additionally highlight the  $D(\text{Denisovan, Altai Neanderthal, Vindija Neanderthal, Human-Chimp Ancestor})$  at this window within *EPAS1* as a blue solid line (Figure 2b). We computed the  $p$ -value of the  $D(\text{Denisovan, Neanderthals, Tibetan, Chimp})$  at *EPAS1* with Tibetans in the tree using the genome-wide distribution.

### Forward Simulations in program SLiM

We used SLiM 3.2.0(2) to perform all simulations in this study. To reduce the computational burden of simulations, we rescaled the simulation parameters in this study by a scaling factor  $C$ , where  $C=10$  in this study. The principle of scaling the parameter followed: population size =  $N/C$ , times =  $t/C$ , selection coefficients =  $s \times C$ , mutation rate =  $\mu \times C$ , and recombination rate =  $r \times C$ . The total length of simulated genomic sequence remained the same. Throughout the paper, we describe the simulation parameters as original parameters before scaling.

We simulated under four different variations of a three-population demographic model described in Figure S7a-d. After a burn-in period of  $10 \times N$  generations (100,000 generations in this study) of a single population representing the ancestral population of modern and archaic humans. In Model A (results shown in the main text), at 16,000 generations ago, the population split into an archaic population (Denisovans) and the ancestral modern human population. After that, at 2,500 generations ago, ancestral Tibetan population split off from the African population with its population size reduced to 1,860, which describes the Out-of-Africa bottleneck (3). Based on PSMC results for the Tibetans in this study (Lu et al. 2016), the Tibetan population size remained constant until 1,500 generations ago and further reduced to  $N_e = 1,000$ . The second bottleneck lasted for 100 generations followed by a population growth into  $N_e=7000$  and remained constant for the rest of the simulation. The end of the second bottleneck is timed so that it is around the European-Asian

47 split inferred in Ragsdale and Gravel (2019). Subsequently, at a time point drawn from a uniform  
 48 distribution between 500 generations ago to 2,400 generations ago, a single pulse of gene flow  
 49 happened from Denisovans into ancestral Tibetans. The admixture proportion was set to 0.1%.  
 50 Model B shares all demographic parameters with Model A except that the second bottleneck  
 51 occurred at 920 generations ago with the minimum  $N_e = 1,160$  (4). The end of the second bottleneck  
 52 is around the time of the European-Asian split time inferred in Gravel et al. 2011. Model C only  
 53 describes one severe bottleneck effect experienced by ancestral Tibetans, which happened from the  
 54 Out-of-Africa migrations when the population size reduced to 120 individuals. This bottleneck  
 55 lasted for 100 generations and then the population recovered to a size of 7,000. Model D differs  
 56 from Model C by having 1% of admixture proportion.

57 As for the positive selection on *EPAS1*, we introduced 1 adaptive mutation in the middle of  
 58 the simulated segment at 15,000 generations ago to all haplotypes in the archaic population to  
 59 ensure fixation in the archaic population before introgression. The selection coefficient ( $s$ ) of the  
 60 adaptive mutation varied between 0 and 0.02 with step size of 0.0002. Right after admixture, the  
 61 previously adaptive mutation (in the archaic population) was set to be neutral in Tibetans until the  
 62 specified onset time of selection. For each admixture time, a randomly chosen selection start time  
 63 was simulated between right after admixture (up to 2,400 generations/72,000 years ago) and as  
 64 soon as 100 generations ago (3,000 years ago), at average step size of 100 generations. At the time  
 65 of selection, the selection coefficient of the adaptive mutation in Tibetans resumed to its original  
 66 value as when introduced in Denisovans, and remained constant until the end of the simulation. We  
 67 only kept the simulations where the adaptive mutation was not lost in the recipient population by  
 68 the end of each simulation (adaptive mutation frequency  $> 0$  in Tibetans). We sampled 2, 176, and  
 69 156 haplotypes from the Denisovan, African and Tibetan populations respectively, matching the  
 70 sample size in the empirical dataset of Denisovans, unadmixed Africans (YRI), and Tibetans. We  
 71 obtained 400,000 replicates under each demographic model for the ABC inference.

72  
73

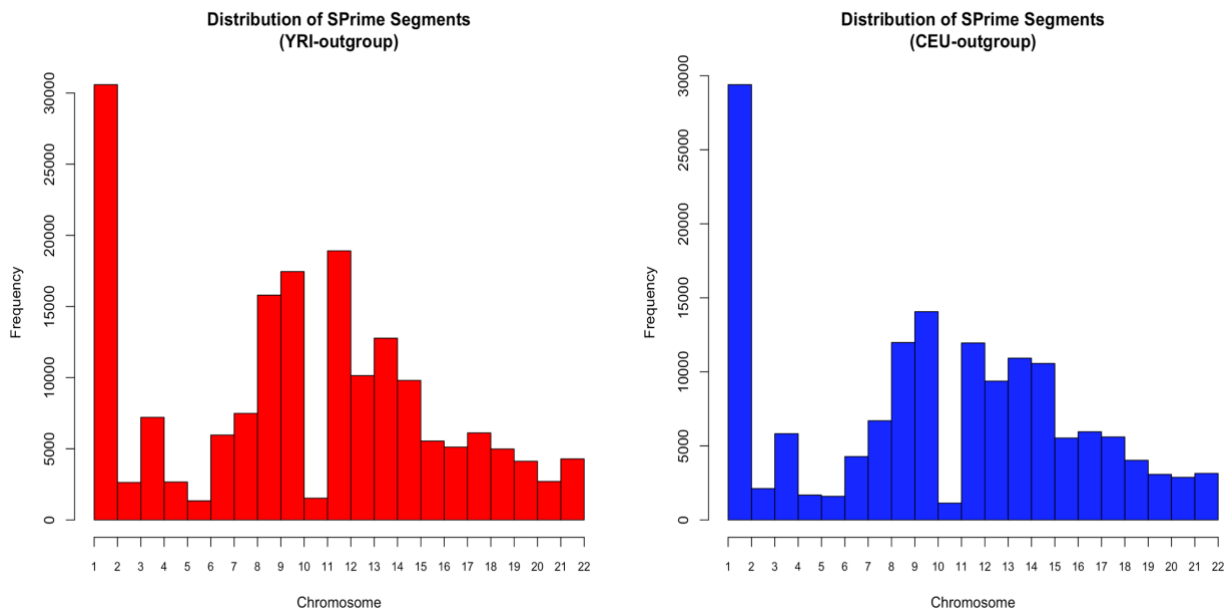

74  
75 **Figure S1: Chromosomal distribution of putatively archaic-introgressed segments inferred**  
76 **using YRI and CEU as outgroup. This figure shows the distribution of putatively introgressed**

77 segments on the 22 autosomes, inferred by SPrime using YRI and CEU as outgroup respectively. The X-  
 78 axis denotes the chromosome number. The Y-axis is the number of segments in the corresponding  
 79 chromosome.

80  
 81  
 82

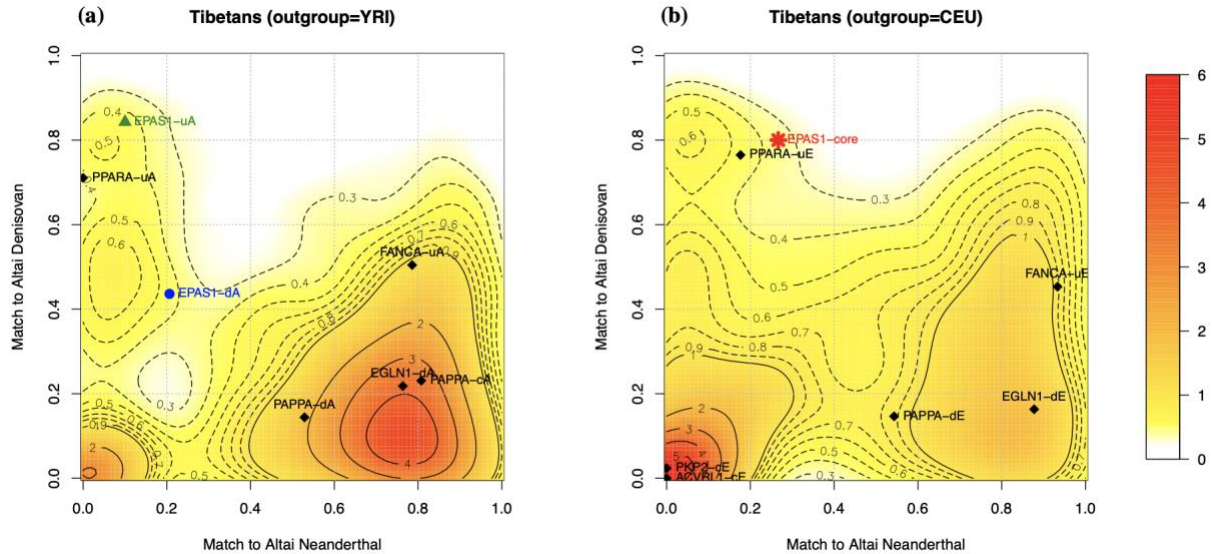

83  
 84 **Figure S2: Match rate distribution of introgressed segments in Tibetans.** This figure shows the  
 85 density distribution of match rate to archaic individuals in putatively archaic introgressed segments  
 86 in Tibetan population ( $n=38$ ), inferred by SPrime using Africans as unadmixed outgroup (YRI, panel a)  
 87 or using Europeans as the outgroup (CEU, panel b). The match rate is defined as the proportion of  
 88 alleles at the SPrime diagnostic SNPs in a putatively introgressed segment that are present in the  
 89 genome of archaic individuals at those positions (5). The color range denotes the density of the  
 90 contours, with red indicating high density and yellow indicating low density. The introgressed segment  
 91 detected within the EPAS1 gene is highlighted as a star symbol. The introgressed segments detected at  
 92 or within 200kb range of other high altitude adaptation candidate gene (Table S3) are highlighted as  
 93 points. After each gene name, “-u/c/d” indicates the location of the segments being in the gene  
 94 upstream, core, or downstream region respectively. “A” or “E” indicates whether the segment was  
 95 inferred using Africans (YRI) or Europeans (CEU) as reference.

96

(a)

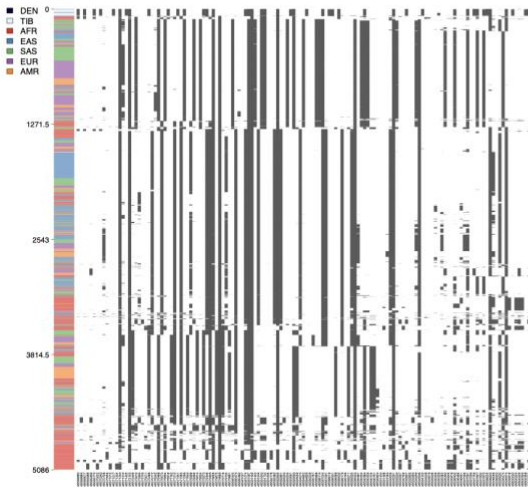

(b)

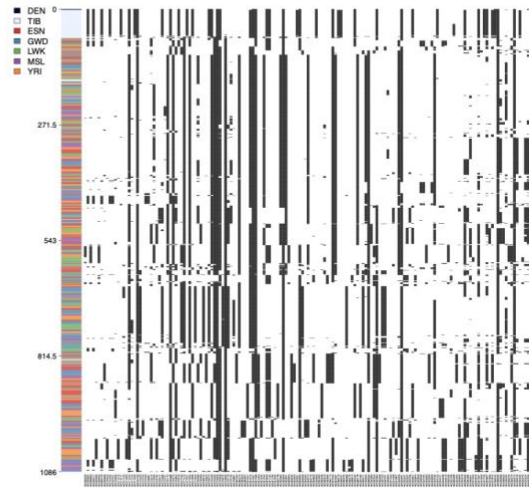

(c)

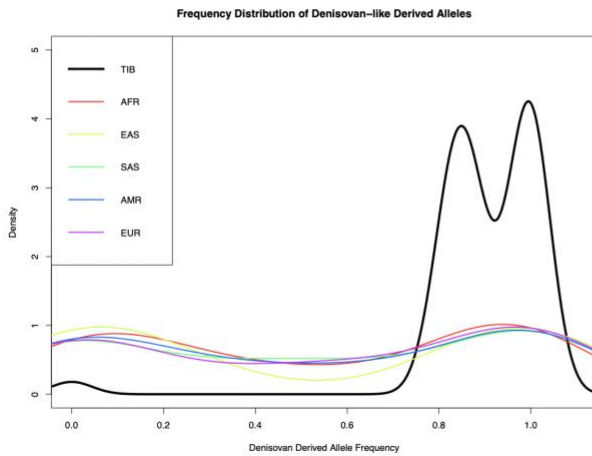

(d)

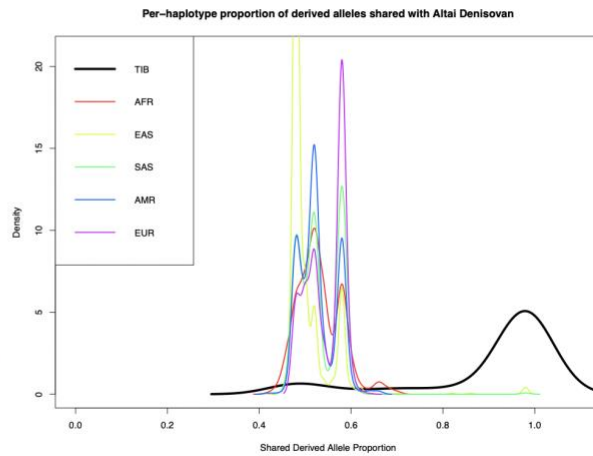

97

98  
99

100 **Figure S3. Denisovan-introgressed haplotype at EPAS1 within the 32.7kb window.** We show the  
 101 haplotype patterns of the introgressed segment in the core region of EPAS1 in Denisovan, Tibetans,  
 102 and worldwide populations (panel a), and Denisovans, Tibetans, and African populations (Panel b) in  
 103 1000 Genomes Project using haplostrips program(6). Each column corresponds to a SNP with black  
 104 cells representing the presence of derived alleles. Each row is a phased haplotype. The colored panel  
 105 on the left shows the population for haplotypes. Unphased Denisovan genotypes are shown as the top  
 106 two rows (black). We further plot the frequency distribution of Denisovan-like alleles (defined as the  
 107 Altai Denisovan carrying the derived allele in homozygous state) within this window in Tibetans and  
 108 worldwide populations (Panel c), and the distribution of the proportion of Denisovan-like alleles in  
 109 each haplotype in Tibetans and worldwide populations (Panel d). Altogether, these plots show that  
 110 although worldwide populations all carry a small amount of Denisovan alleles, only Tibetans carry the  
 111 alleles in high frequency and in large proportion. The alleles shared between Denisovans and modern  
 112 humans are unlikely originated from backward gene flow into Africa, but rather, they reflect shared  
 113 ancestry between Denisovans and modern humans.

114

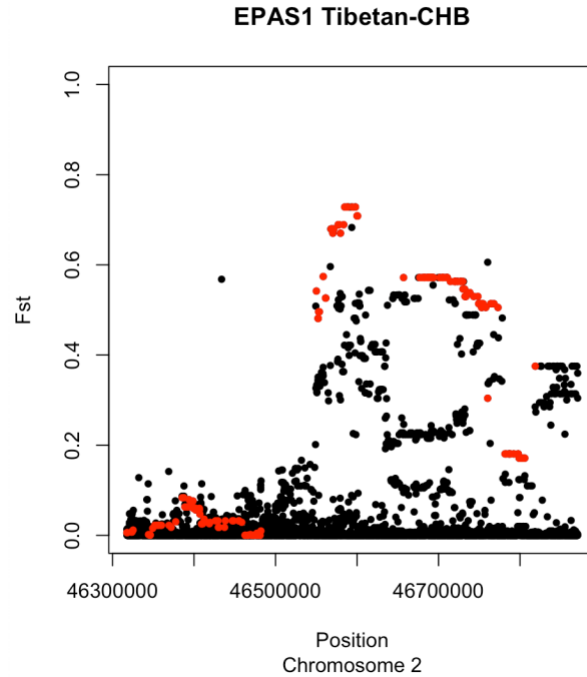

116  
 117  
 118  
 119  
 120  
 121  
 122  
 123  
 124  
 125  
 126  
 127  
 128  
 129  
 130  
 131  
 132

**Figure S4:  $F_{ST}$  between Tibetans and Han Chinese within 200kb of EPAS1 region.** We show the  $F_{ST}$  values of all SNPs at or within 200kb region of EPAS1 in black points. The x-axis shows the genomic position of the SNPs (hg19), and the y-axis shows the  $F_{ST}$  value. The red points highlight the diagnostic SNPs that are tagged in this region detected by SPrime (See Table 1).  $F_{ST}$  values are calculated between Tibetan and Han Chinese (CHB). The introgressed variants within the EPAS1 region show the highest allele frequency differentiation, indicating positive selection.

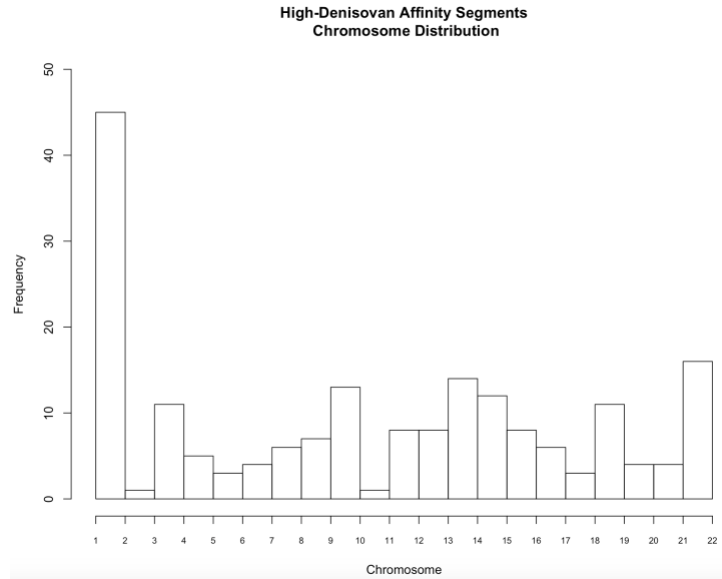

133  
 134  
 135  
 136  
 137  
 138  
 139  
 140  
 141  
 142  
 143  
 144  
 145  
 146  
 147  
 148  
 149  
 150  
 151  
 152  
 153  
 154  
 155  
 156  
 157  
 158  
 159  
 160  
 161  
 162  
 163

**Figure S5. “High Denisovan Affinity” introgressed segment distribution on 22 autosomes.** We show the chromosomal distribution of SPrime segments that have match rate less than 40% to Altai Neanderthal, and larger than 60% to Altai Denisovan, which represent the segments introduced by the East Asian-specific Denisovan introgression.

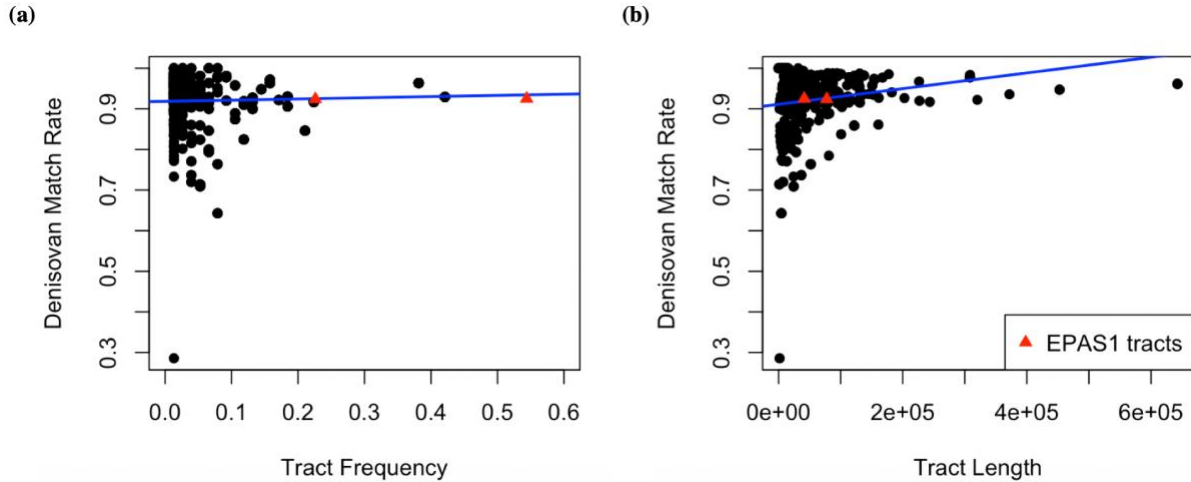

164  
 165  
 166  
 167  
 168  
 169  
 170  
 171  
 172  
 173  
 174  
 175  
 176  
 177  
 178  
 179  
 180  
 181  
 182  
 183  
 184  
 185  
 186  
 187  
 188  
 189  
 190  
 191  
 192  
 193  
 194  
 195  
 196

**Figure S6. Introgressed tract frequency, length and Denisovan match rate relationship.** *This figure shows match rates distribution of Denisovan-introgressed segments, with respect to the frequency of each segment in Tibetan population (panel a), and the length of these tracts (panel b). All segments are detected by HMM from 38 Tibetan whole genomes. The black points represent introgressed tracts inferred by HMM, summarized by tract length. The input genotypes for HMM inference include derived alleles within the range of the first and last diagnostic SNPs in each unique SPrime segment. The red triangle points represent the introgressed tracts at EPAS1, including a long and a short segment (80kb and 40kb respectively, see Figure S9). The tract length is computed by the distance between the first and last position of a continuous introgressed tract inferred from each haplotype. The tract frequency is the number of haplotypes harboring the tract of a specific length divided by the total number of haplotypes. The match rate is defined as the proportion of SNPs in a segment that is present in the Altai Denisovan genome at respective positions.*

197

(a) Model A

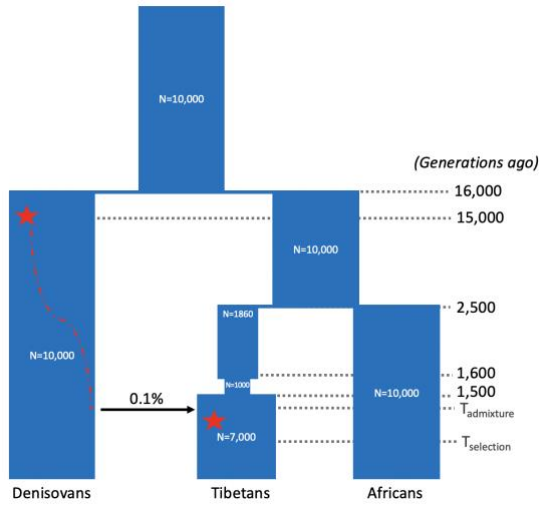

(b) Model B

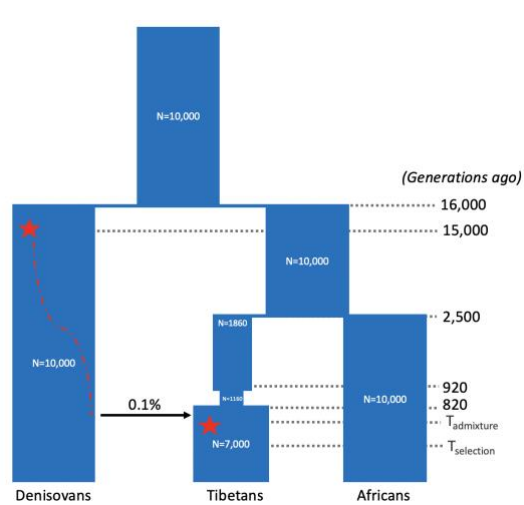

(c) Model C

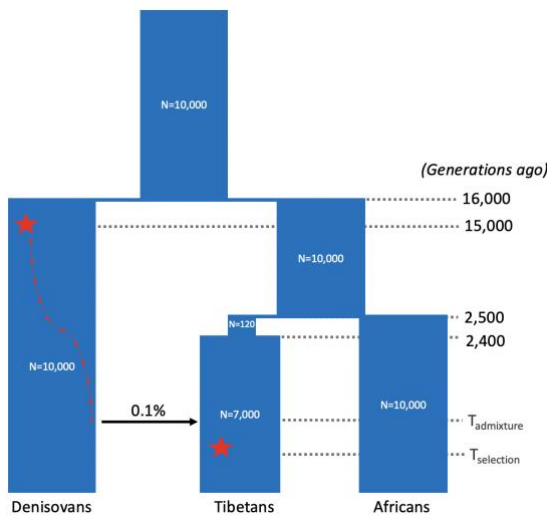

(d) Model D

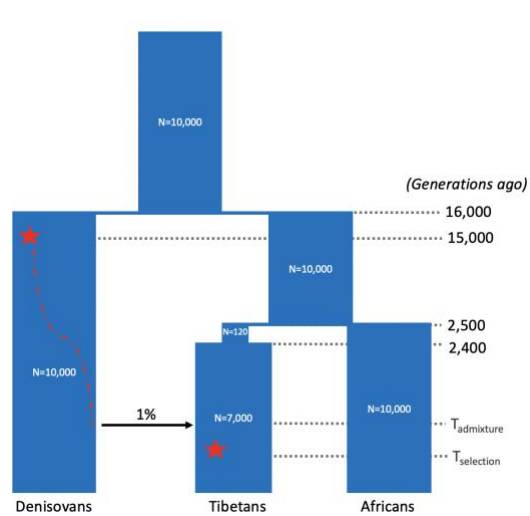

198

199

200

201

202

203

| Parameter                                | Value Range             |
|------------------------------------------|-------------------------|
| Admixture time ( $T_{admixture}$ )       | [500, 2400]             |
| Selection start time ( $T_{selection}$ ) | [100, $T_{admixture}$ ) |
| Selection Strength                       | [0, 0.1]                |

204

205

206

207

208

209

210

**Figure S7: ABC Simulation demography models and parameters.** Panel a-d show four variations of the Denisovan introgression demography simulated for the ABC inference. Model A represents the model used to show results in the main text. These models only vary by the number and duration of bottleneck(s) Tibetans experienced since Out-of-Africa (OoA), and/or the amount of Denisovan introgression. Going forward in time, after a burn-in period of  $10 \cdot N$  (100k) generations, the ancestral



211 population split into two subpopulations, the archaic (Denisovans) and ancestral modern human  
 212 populations, at 16k generations ago (g.o). At 15k g.o, an adaptive mutation occurred in Denisovans  
 213 and became fixed before introgression. The ancestral modern human split into Non-Africans (Tibetans)  
 214 and Africans at 2.5k g.o. In model A, the population size since the OoA is 1,860, and further shrink to  
 215 1,000 at 1.6k g.o. After 100 generations of the second bottleneck, the Tibetan population resumed  
 216 population size to 7,000, and later received a pulse of introgression such that 0.1% of the ancestry in  
 217 Tibetans came from Denisovans. Model B is a variation of Model A by having the second bottleneck  
 218 starting at 920 g.o. with  $N_e = 1160$ . In Model C, Tibetans only experienced one strong bottleneck ( $N =$   
 219  $120$ ) after OoA that lasted for 100 generations, and received 0.1% of Denisovan introgression. Model  
 220 D is the same with Model C but with 1% of Denisovan introgression. The introgressed EPAS1 mutation  
 221 had selection coefficient being 0 (neutral) until the onsite time of positive selection in Tibetans. Table  
 222 S2 has all the parameter estimates for Models A-D.  
 223  
 224

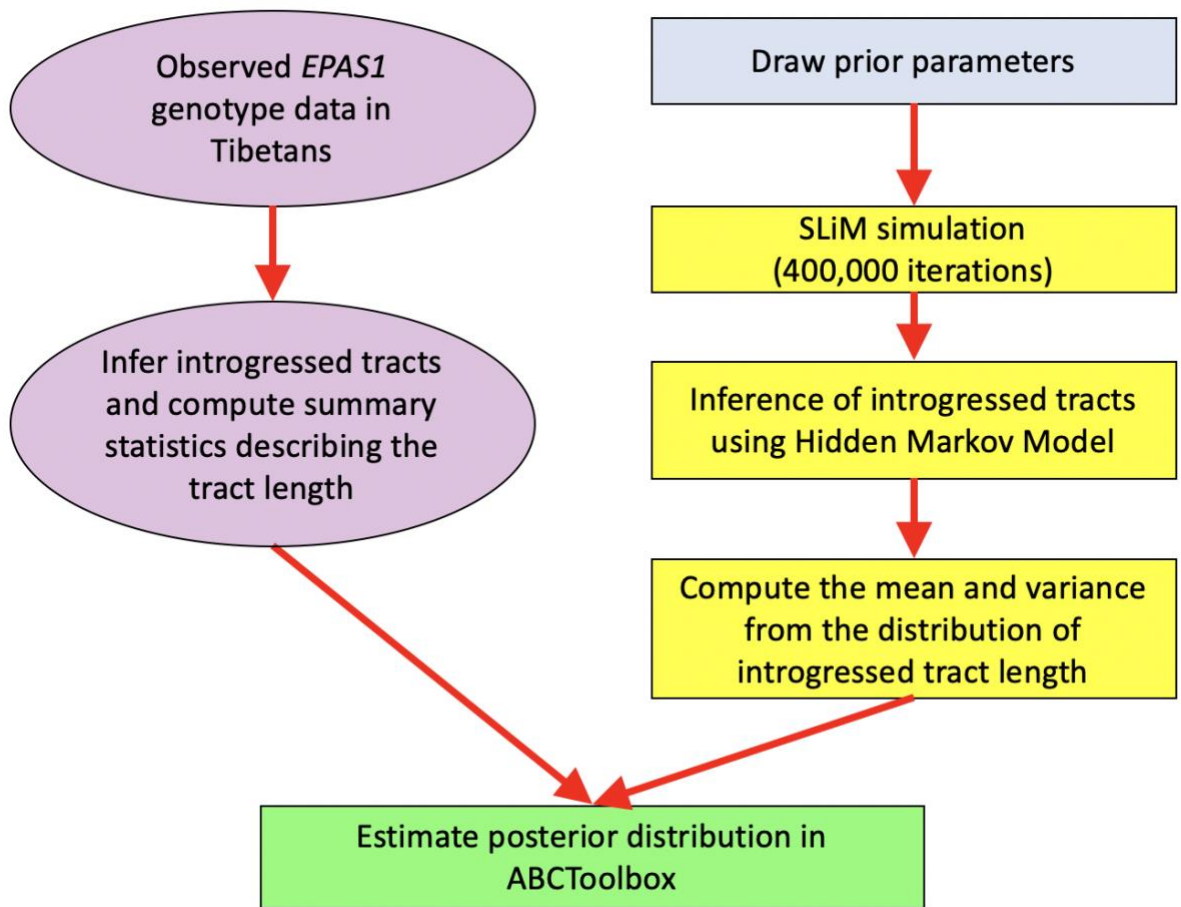

225  
 226 **Figure S8: Flowchart illustration of the ABC inference framework**  
 227

228  
 229  
 230  
 231

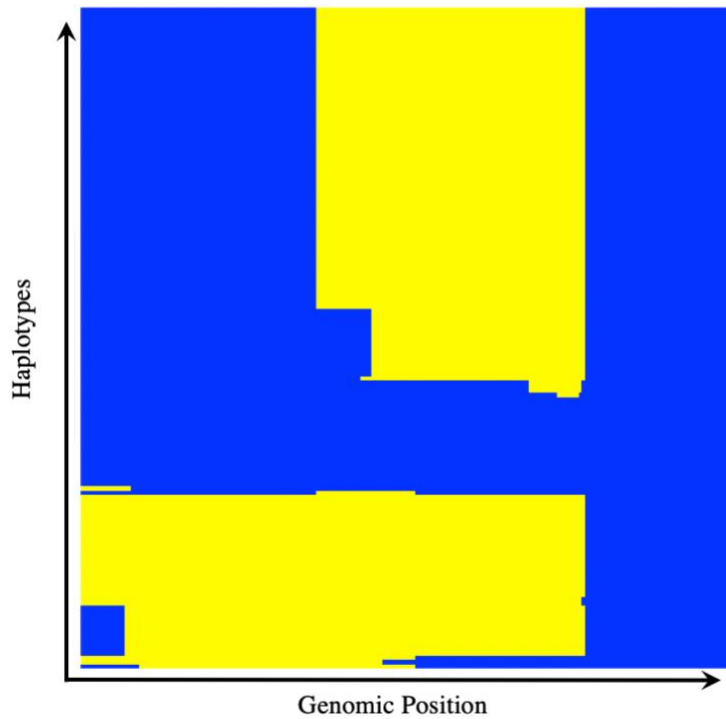

232  
 233  
 234  
 235  
 236  
 237  
 238  
 239  
 240  
 241  
 242  
 243  
 244  
 245  
 246  
 247  
 248  
 249  
 250  
 251  
 252  
 253  
 254  
 255  
 256

**Figure S9: HMM-inferred introgressed tracts in the haplotypes of 78 modern Tibetans at EPAS1 region.** This figure shows the distribution of introgressed tracts in haplotypes of the combined set of 78 Tibetans at EPAS1, inferred by HMM. The introgressed tracts are highlighted in yellow in respect to the EPAS1 region as blue background. The x-axis shows the genomic position of the tracts, and each horizontal line along the y-axis shows a Tibetan haplotype (156 total).

257

**(a) Selection on Standing Archaic Variation**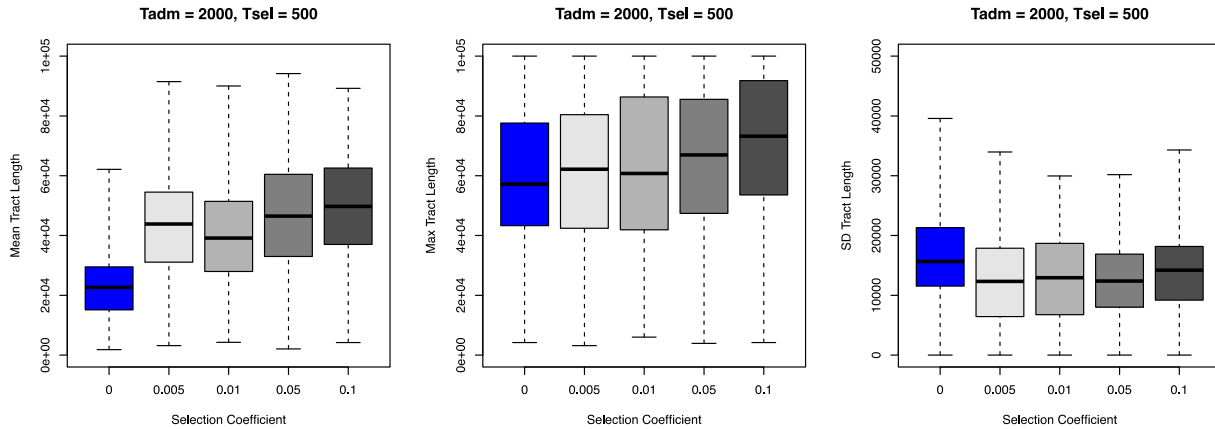

258

259

260

**(b) Adaptive Introgression (no neutral period)**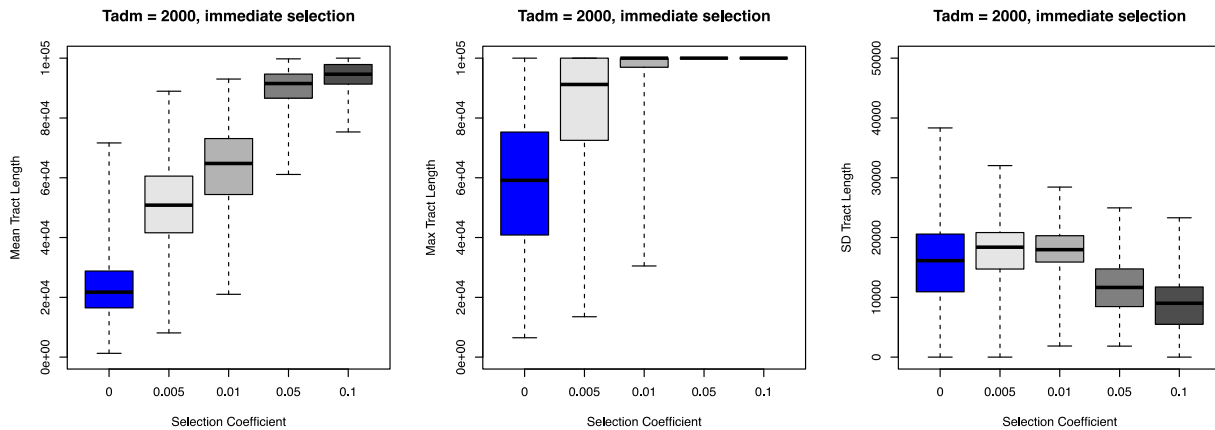

261

262

263

264

265

266

267

268

269

270

271

272

273

274

275

276

277

278

**Figure S10: Relationship between introgressed tract length and selection coefficient, admixture time, and selection start time.** We show the relationship between introgressed tract length (summarized by six statistics) and the strength of selection in simulations used for ABC inference. In the simulations, the admixture time ( $T_{adm}$ ) is fixed at 2,000 generations ago, and the selection time started either at 500 generations ago (panel a; selection on standing archaic variation), or immediately after the introgression (panel b; adaptive introgression). The introgressed tract lengths are tracked directly from the simulation program SLiM. Each data point in the box plot represents the statistic in all individuals from the admixed population per simulation. Each combination of evolutionary parameters (selection time, selection coefficient) was repeated 5,000 times in simulations. The rest of the demography for the simulations is the same as Model C in Figure S7.

279 **(a) Model A**

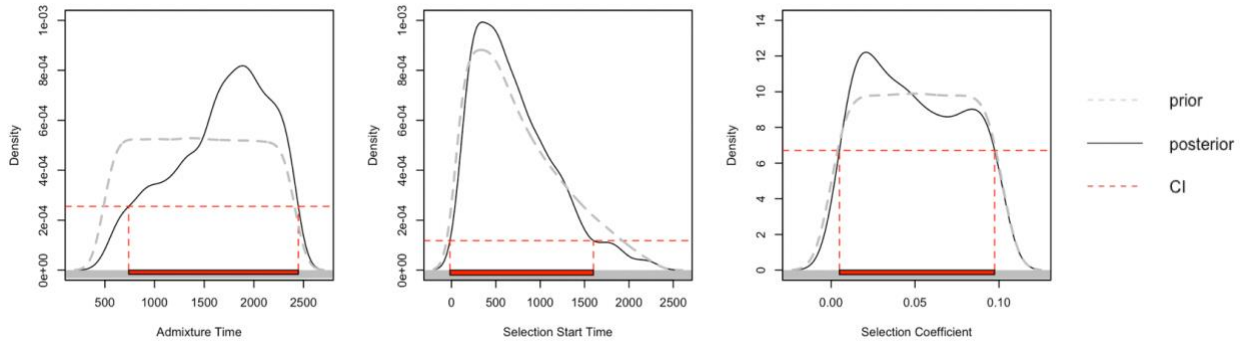

280  
281  
282 **(b) Model B**

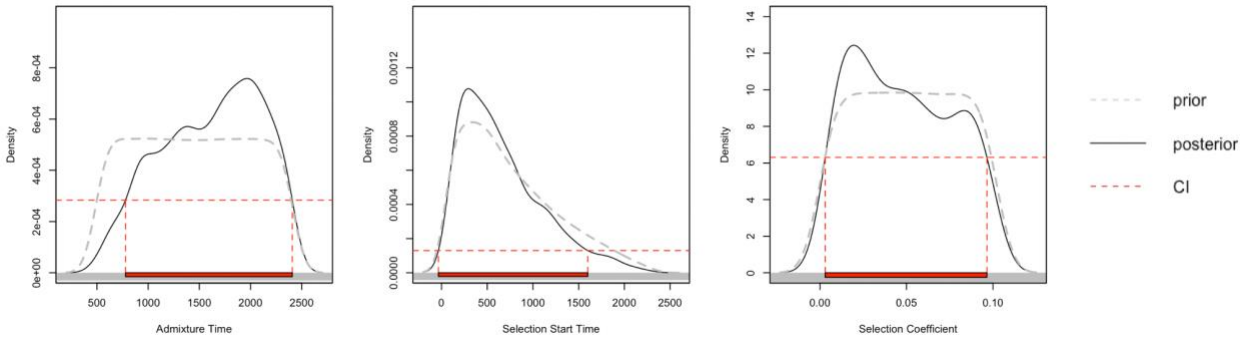

283  
284  
285 **(c) Model C**

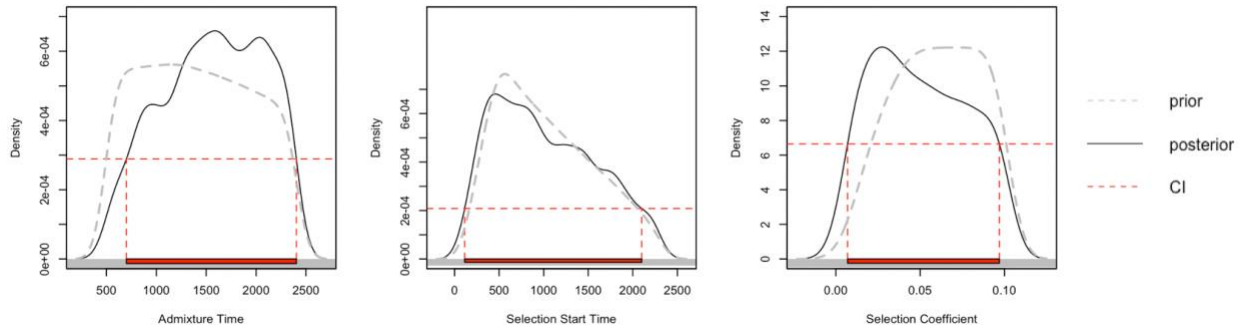

286  
287  
288 **(d) Model D**

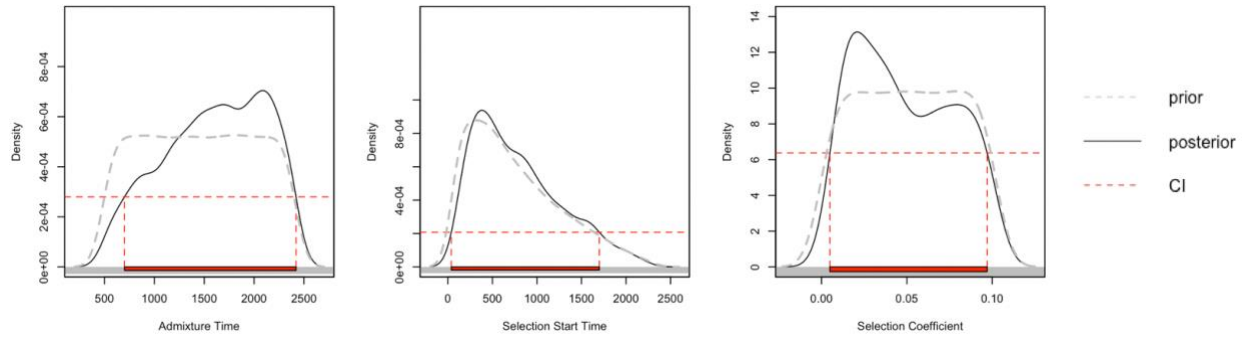

289  
290

291 **Figure S11: ABC Parameter Estimates.** From panel a-d, the panels show the ABC parameter  
 292 estimates for the admixture time, selection start time, and selection coefficient, inferred from  
 293 simulations under the demographic models A-D (Figure S7 and Table S2). In each panel, the gray  
 294 dotted line shows the density distribution of parameters in the simulations (prior), the black solid line  
 295 shows the density distribution of 1,000 retained simulations from ABC using rejection algorithm  
 296 (posterior) from 400,000 simulations, and red dotted line encloses the 95% credible interval range.  
 297 For the admixture and selection start time, the unit for the values is “generations ago”, where one  
 298 generation is assumed to be 25 years.

299  
300  
301  
302  
303  
304  
305  
306  
307  
308  
309  
310

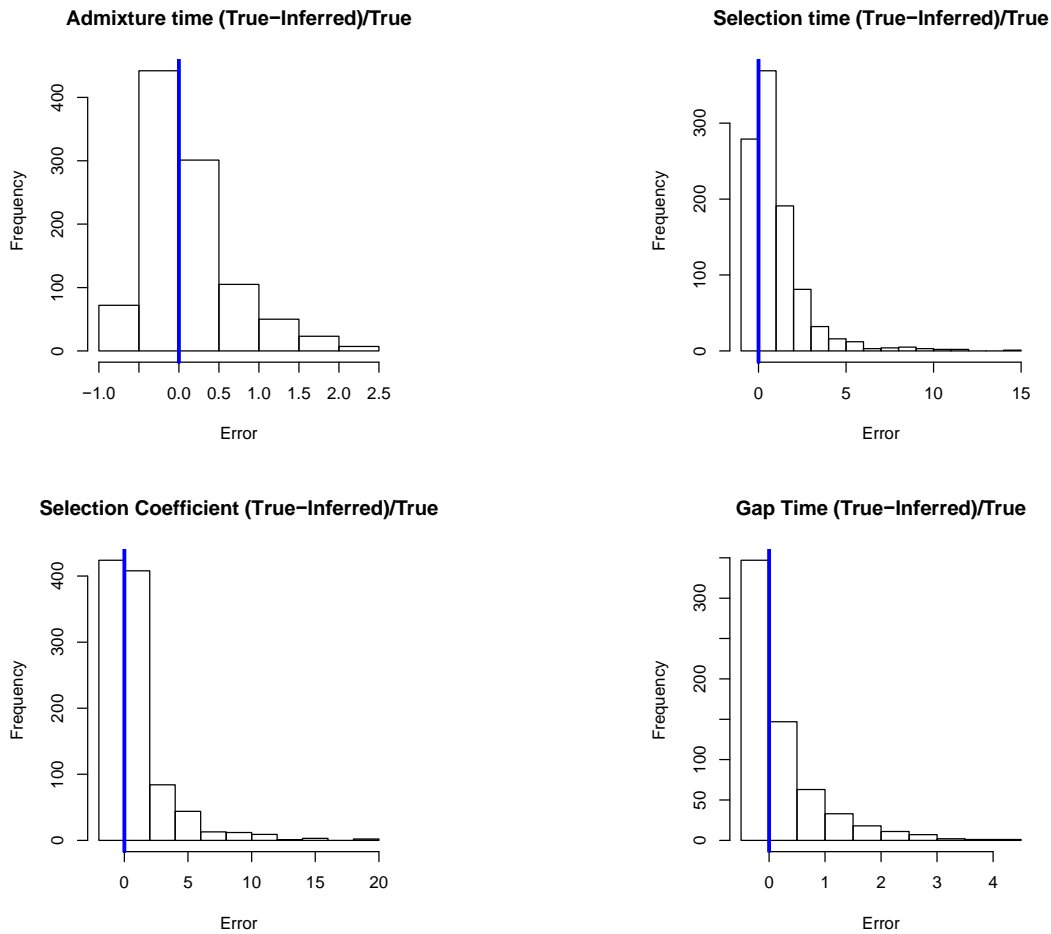

311  
 312 **Figure S12: ABC Parameter estimate error distribution from 1,000 randomly chosen**  
 313 **simulations under Model A.** In this figure, we vetted the accuracy of the ABC approach by randomly  
 314 drawing 1,000 simulations from the total of 400,000 simulations (0.1% admixture), and inferred the  
 315 parameters (admixture time, selection time, selection coefficient) in ABCToolBox using the rest  
 316 399,000 simulations. We compared the difference between the inferred parameters and the true  
 317 parameters in the 1,000 set, and computed “relative errors” (REs) for each summary statistics where  
 318  $RE = (true\ parameter - inferred\ parameter) / true\ parameter$ . The above figures show the distribution  
 319 of the errors in admixture time, selection time, selection coefficient, and the difference between  
 320 admixture and selection time (Gap Time). We show small biases in estimating the parameters, with  
 321 particularly high accuracy in detecting the gap time between admixture and selection.

322  
 323  
 324  
 325  
 326  
 327  
 328

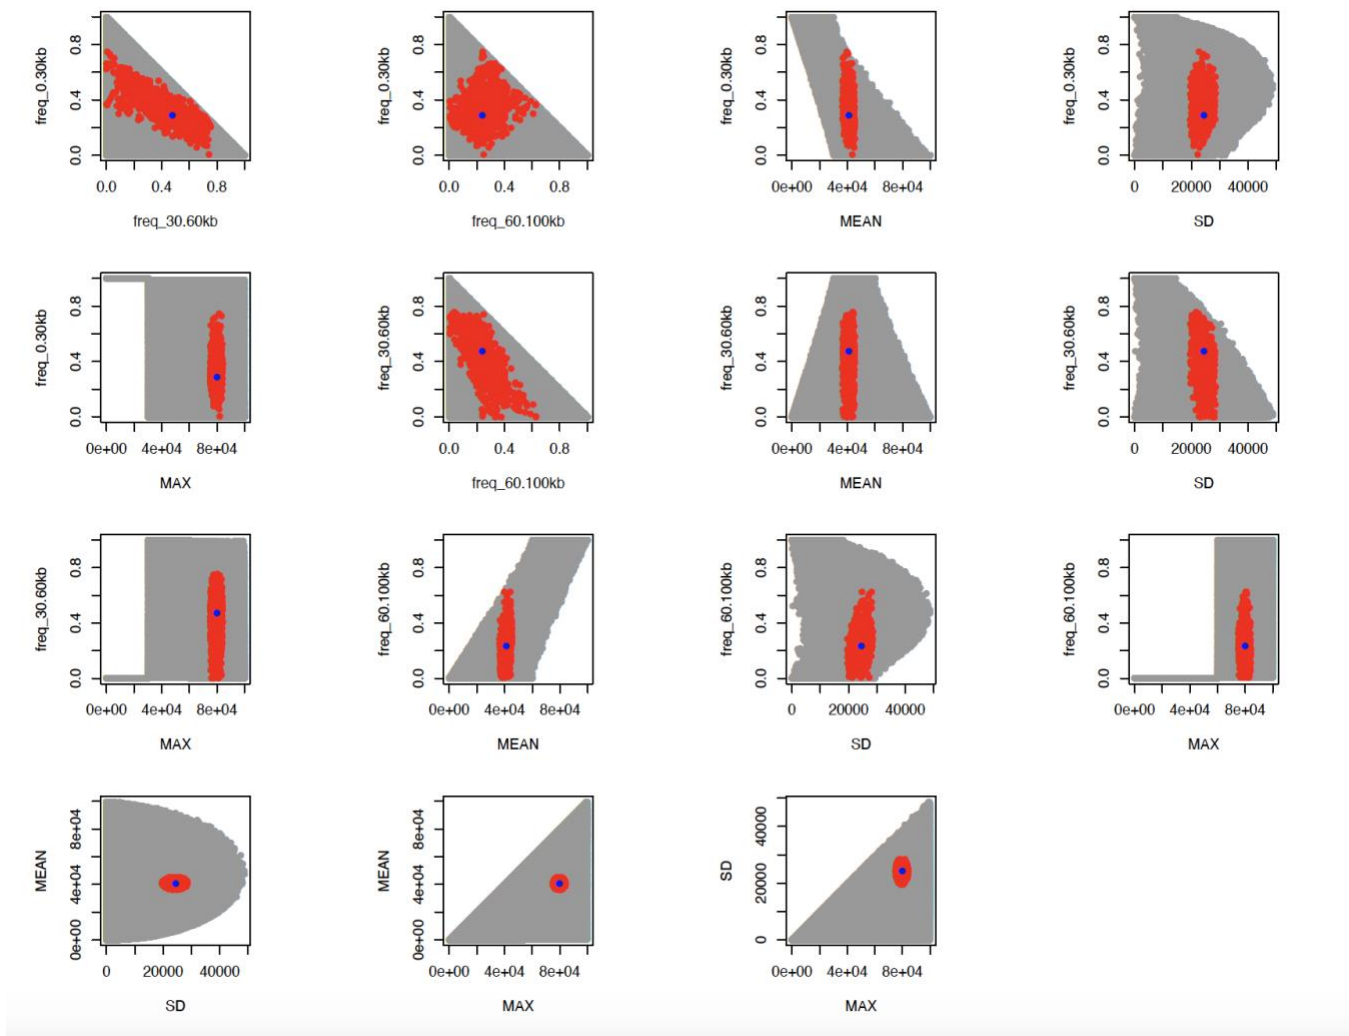

329  
 330  
 331  
 332  
 333  
 334  
 335  
 336  
 337  
 338  
 339  
 340  
 341  
 342  
 343  
 344  
 345  
 346

**Figure S13: The pairwise distribution of summary statistics used in ABC inference (Model A) from observation, simulations, and retained best simulations.** *This figure shows the distribution of pairwise summary statistics between the simulated data under Model A (gray points), retained 1,000 best fitting simulations (red points), and the observed data from 78 Tibetans (blue points). The retained statistics and the observed data show high agreement.*

347

**(a) Summary statistics distribution from retained simulations with sampled parameters**

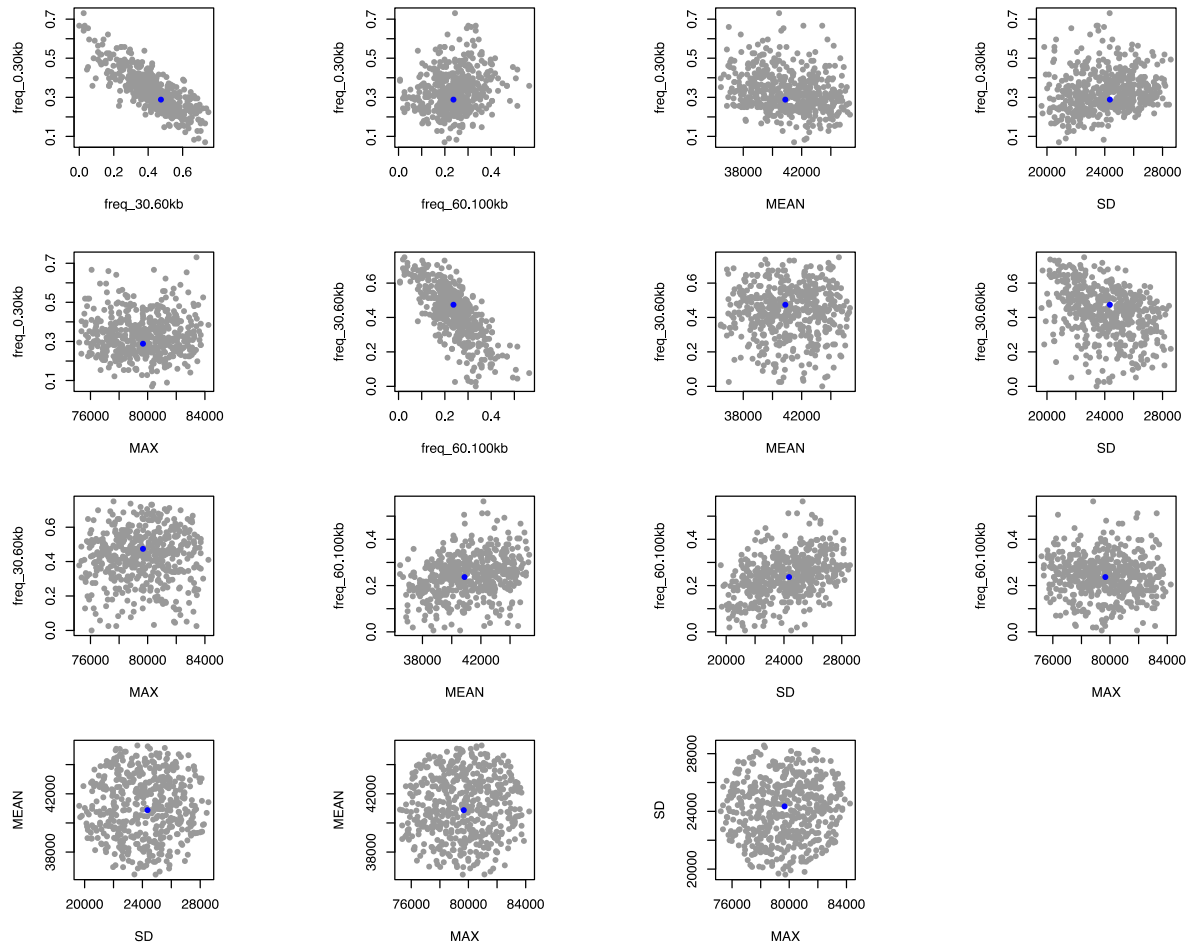

348

349

350

**(b) Summary statistics distribution from new simulations using sampled parameters**



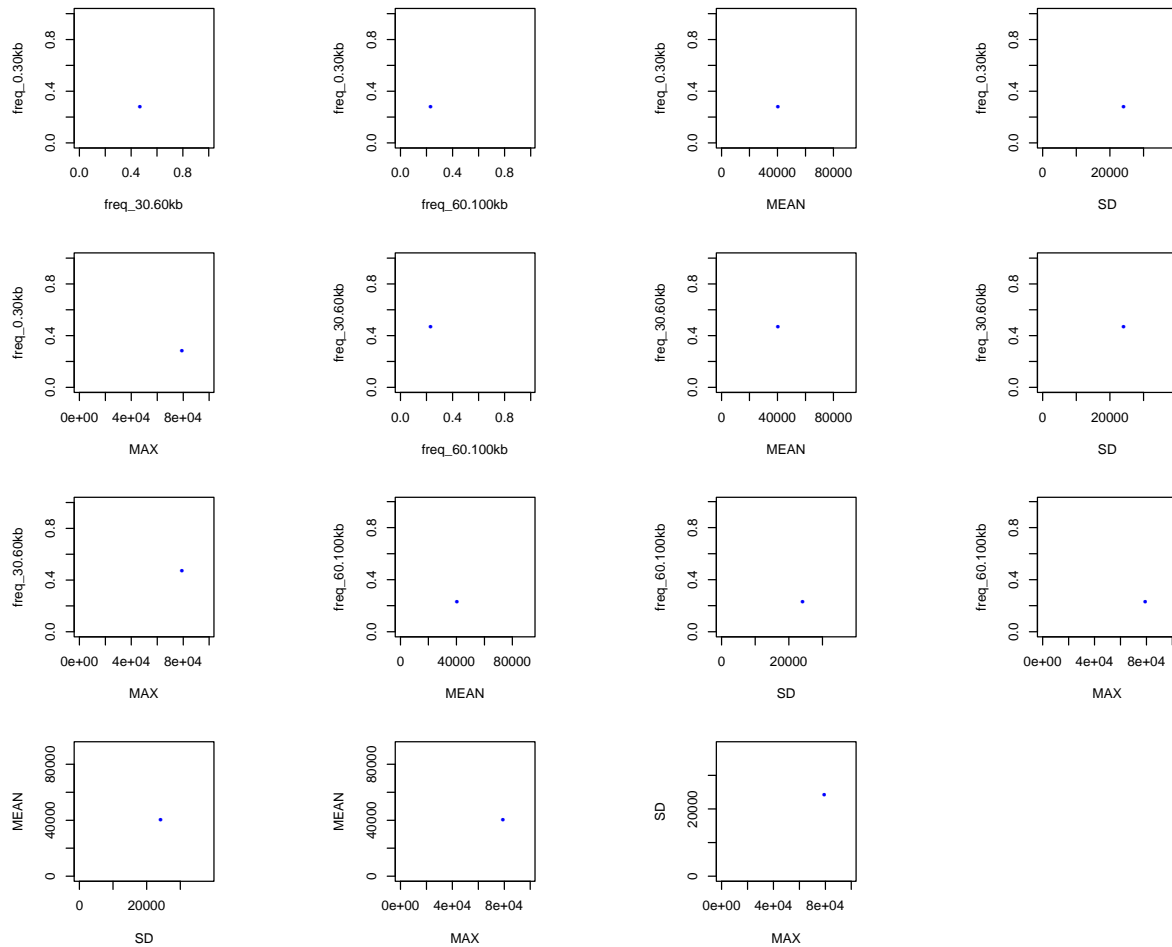

351

352

353 **Figure S14: Posterior predictive checking of 500 randomly sampled sets of parameters from**  
 354 **retained posterior.** *In this figure, we performed posterior predictive checking of the ABC inference*  
 355 *by randomly sampling 500 set of simulation parameters from the retained posterior ( $n=1,000$ ). For*  
 356 *each set of parameters, we obtained 1 new simulation using these parameters, and computed the*  
 357 *summary statistics in ABC. We compared the original distribution of pairwise summary statistics from*  
 358 *the sampled posterior (left panel, posterior in gray points) with regards to the observed data (blue*  
 359 *points), and the distribution of pairwise statistics obtained from the new simulations (right panel, new*  
 360 *simulations in red points) with regards to the observed data. We show that parameters sampled from*  
 361 *the posterior are capable of reproducing the range of summary statistics seen in the posterior.*

362

363

364

365

366

367

368

369

370

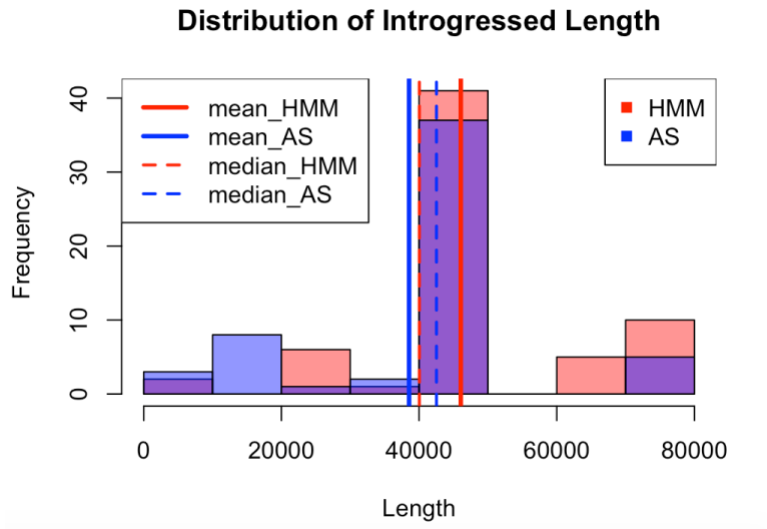

371

372

373

374

375

376

377

378

379

380

381

382

383

384

385

386

387

388

389

390

391

392

393

394

395

396

397

398

399

400

401

**Figure S15: Distribution of introgressed tract length in *EPAS1* region inferred by HMM and ArchaicSeeker 2.0(4).** In this figure, we compared the distribution of introgressed tract length inferred from 38 Tibetans at haplotype level within the *EPAS1* region, inferred from HMM (red) and ArchaicSeeker 2.0 ("AS", blue) programs. The solid and dashed lines highlight the mean and median of tract length respectively. We show high level of agreement between the two methods for length inference.

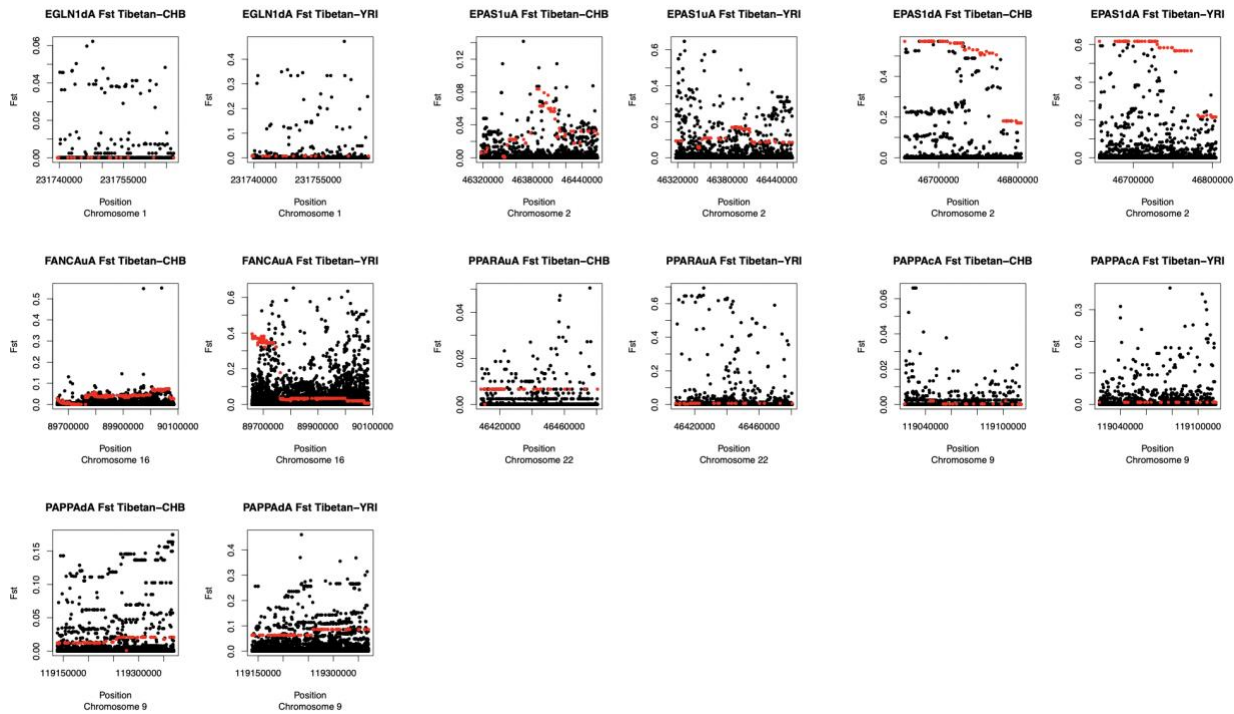

403

404

405

406 **Figure S16:  $F_{ST}$  between Tibetans, Han Chinese and Yorubans on segments overlapping**  
 407 **between high altitude adaptation candidate genes and SPrime-inferred segments.** *The above*  
 408 *figure show the  $F_{ST}$  values of SNP variants (black points) within SPrime-inferred segments that are at*  
 409 *or near high altitude adaptation candidate genes, with introgressed archaic variants highlighted as*  
 410 *red points (archaic variants = diagnostic SNPs inferred from SPrime). After each gene name, “u/c/d”*  
 411 *indicates the location of the segments being in the gene upstream, core, or downstream region*  
 412 *respectively. “A” indicates that these segments were inferred using Africans (YRI) as the outgroup.*

413

414

415

416

417

418

419

420

421

422

423

424

425

426

427

428

429  
430

**Table S1: Model choice estimates**

| <b>M1 Marginal Density</b> | <b>M2 Marginal Density</b> | <b>M1 Posterior Probability</b> | <b>M2 Posterior Probability</b> | <b>Bayes Factor M1/M2</b> | <b>Chosen Model</b> |
|----------------------------|----------------------------|---------------------------------|---------------------------------|---------------------------|---------------------|
| 1.41E-19                   | 2.79E-20                   | 0.83                            | 0.17                            | 5.04                      | 1                   |

431

432 *This table shows the model selection bias between two competing models for the selection of Denisovan*  
 433 *EPAS1 allele in Tibetan populations: “Selection on standing archaic variation” model (M1) where a*  
 434 *gapped time between introgression and selection is observed, and “Immediate selection on archaic*  
 435 *variation” model (M2) where the positive selection is continuous before and after the introgression.*  
 436 *We obtained equal number of simulation replicates between the two models (n=400,000), and inferred*  
 437 *posterior probabilities using ABCToolBox. The Bayes Factor, which measures the ratio between*  
 438 *posterior probabilities of two models, shows a strong favor for M1 over M2.*

439

440 **Table S2: Parameter estimates of EPAS1 adaptive introgression under demographic models**  
 441 **A-D**

442

| <b>Parameter</b>             | <b>Model A</b>                              | <b>Model B</b>                              | <b>Model C</b>                              | <b>Model D</b>                              |
|------------------------------|---------------------------------------------|---------------------------------------------|---------------------------------------------|---------------------------------------------|
| $T_{adm}$<br>(generations)   | 1950.303 (48.76 ka)<br>[639.500 – 2380.000] | 1947.424 (48.69 ka)<br>[680.000 – 2360.000] | 1741.280 (43.53 ka)<br>[580.000 – 2360.000] | 2106.860 (52.67 ka)<br>[580.000 – 2360.000] |
| $T_{sel}$<br>(generations)   | 357.033 (8.93 ka)<br>[100.000 - 1702.500]   | 301.757 (7.54 ka)<br>[100.000 – 1800.000]   | 492.055 (12.30 ka)<br>[200.000 - 2200.000]  | 369.789 (9.24 ka)<br>[100.000 - 1900.000]   |
| <b>Selection coefficient</b> | 0.018<br>[0.005 - 0.099]                    | 0.018<br>[0.005 - 0.099]                    | 0.018<br>[0.007 - 0.097]                    | 0.018<br>[0.007 - 0.099]                    |

443

444 *This table shows the estimate of the three parameters in ABC inference of the evolutionary history of*  
 445 *EPAS1 in Tibetans, including the admixture ( $T_{adm}$ ), and positive selection start time ( $T_{sel}$ ), and the*  
 446 *selection coefficient. We show the point estimates of parameters using the mode of the posterior*  
 447 *distributions, and 95% credible intervals. We convert times to year units by assuming that one*  
 448 *generation is 25 years.*

449

450 **Table S3: High Altitude Adaptation-Associated Genes**

451

| Chromosome | Start Position (hg19) | End Position (hg19) | Gene Name          |
|------------|-----------------------|---------------------|--------------------|
| 1          | 155034154             | 155496154           | <i>PKLR</i>        |
| 1          | 158373495             | 158863506           | <i>SPTA1</i>       |
| 1          | 176225306             | 177018970           | <i>PAPPA2</i>      |
| 1          | 231292497             | 231767790           | <i>EGLN1/DISC1</i> |
| 2          | 46317540              | 46820842            | <i>EPAS1</i>       |

|    |           |           |                |
|----|-----------|-----------|----------------|
| 2  | 108656650 | 109211270 | <i>SULT1C3</i> |
| 2  | 203896163 | 204503892 | <i>CYP20A1</i> |
| 5  | 58057865  | 59990925  | <i>PDE4D</i>   |
| 6  | 25860489  | 26322489  | <i>HFE</i>     |
| 6  | 71170478  | 71778716  | <i>SMAP1</i>   |
| 9  | 118709070 | 119371600 | <i>PAPPA</i>   |
| 10 | 89416194  | 89935532  | <i>PTEN</i>    |
| 10 | 104362789 | 104824789 | <i>CYP17A1</i> |
| 11 | 5038034   | 5500034   | <i>HBB/HBE</i> |
| 12 | 32736679  | 33256780  | <i>PKP2</i>    |
| 12 | 33321347  | 33799754  | <i>SYT10</i>   |
| 12 | 52078173  | 52540173  | <i>ACVRL1</i>  |
| 12 | 120220647 | 120739299 | <i>CCDC64</i>  |
| 15 | 48192879  | 48654879  | <i>SLC24A5</i> |
| 16 | 4311533   | 4773533   | <i>HMOX2</i>   |
| 16 | 89596958  | 90090065  | <i>FANCA</i>   |
| 22 | 41281613  | 41783081  | <i>EP300</i>   |
| 22 | 46339498  | 47140067  | <i>PPARA</i>   |
| X  | 12763286  | 13225286  | <i>TMSB4X</i>  |

452  
453  
454  
455  
456

**Table S4: Denisovan-like allele frequency distribution in worldwide populations within the 32.7kb window in *EPAS1***

| CHROM | POS      | REF | ALT | Freq_DEN | Freq_TIB | Freq_AFR | Freq_EAS | Freq_SAS | Freq_EUR | Freq_AMR |
|-------|----------|-----|-----|----------|----------|----------|----------|----------|----------|----------|
| 2     | 46568680 | A   | G   | 1.000    | 0.816    | 0.059    | 0.008    | 0.002    | 0.001    | 0.006    |
| 2     | 46569017 | A   | G   | 1.000    | 0.816    | 0.059    | 0.008    | 0.002    | 0.001    | 0.006    |
| 2     | 46569770 | G   | A   | 1.000    | 0.816    | 0.070    | 0.008    | 0.002    | 0.001    | 0.004    |
| 2     | 46570342 | G   | A   | 1.000    | 0.816    | 0.036    | 0.009    | 0.002    | 0.001    | 0.004    |
| 2     | 46571017 | C   | G   | 1.000    | 0.816    | 0.005    | 0.008    | 0.002    | 0.000    | 0.000    |
| 2     | 46571243 | T   | C   | 1.000    | 1.000    | 0.835    | 1.000    | 1.000    | 0.999    | 0.987    |
| 2     | 46571435 | G   | C   | 1.000    | 0.816    | 0.000    | 0.008    | 0.002    | 0.000    | 0.000    |
| 2     | 46575388 | A   | G   | 1.000    | 0.829    | 0.231    | 0.103    | 0.289    | 0.195    | 0.340    |
| 2     | 46576488 | T   | C   | 1.000    | 0.868    | 0.490    | 0.244    | 0.600    | 0.714    | 0.614    |
| 2     | 46576918 | T   | C   | 1.000    | 0.829    | 0.067    | 0.010    | 0.002    | 0.000    | 0.003    |
| 2     | 46577251 | T   | C   | 1.000    | 0.829    | 0.000    | 0.010    | 0.002    | 0.000    | 0.000    |
| 2     | 46577299 | A   | G   | 1.000    | 0.868    | 0.125    | 0.150    | 0.372    | 0.501    | 0.264    |
| 2     | 46579273 | A   | G   | 1.000    | 0.829    | 0.210    | 0.102    | 0.296    | 0.235    | 0.367    |
| 2     | 46579348 | T   | C   | 1.000    | 0.961    | 0.573    | 0.787    | 0.411    | 0.294    | 0.388    |
| 2     | 46579658 | A   | G   | 1.000    | 1.000    | 0.818    | 0.906    | 0.712    | 0.784    | 0.643    |
| 2     | 46581087 | T   | C   | 1.000    | 1.000    | 0.859    | 1.000    | 1.000    | 1.000    | 0.991    |
| 2     | 46581643 | T   | C   | 1.000    | 0.868    | 0.297    | 0.137    | 0.359    | 0.473    | 0.244    |
| 2     | 46581732 | G   | C   | 1.000    | 0.868    | 0.296    | 0.137    | 0.359    | 0.472    | 0.244    |

|   |          |   |   |       |       |       |       |       |       |       |
|---|----------|---|---|-------|-------|-------|-------|-------|-------|-------|
| 2 | 46583593 | A | G | 1.000 | 0.868 | 0.482 | 0.240 | 0.640 | 0.638 | 0.588 |
| 2 | 46584859 | A | G | 1.000 | 0.855 | 0.000 | 0.010 | 0.002 | 0.000 | 0.000 |
| 2 | 46587034 | T | G | 1.000 | 0.987 | 0.708 | 0.908 | 0.772 | 0.871 | 0.690 |
| 2 | 46589032 | C | T | 1.000 | 0.855 | 0.110 | 0.010 | 0.003 | 0.022 | 0.017 |
| 2 | 46590384 | C | G | 1.000 | 0.895 | 0.604 | 0.231 | 0.583 | 0.654 | 0.597 |
| 2 | 46592807 | C | T | 1.000 | 0.855 | 0.123 | 0.008 | 0.003 | 0.022 | 0.022 |
| 2 | 46594122 | A | G | 1.000 | 0.855 | 0.003 | 0.008 | 0.002 | 0.000 | 0.000 |
| 2 | 46597581 | T | C | 1.000 | 0.895 | 0.474 | 0.342 | 0.499 | 0.758 | 0.448 |
| 2 | 46597756 | A | C | 1.000 | 0.855 | 0.002 | 0.008 | 0.005 | 0.046 | 0.039 |
| 2 | 46597827 | A | G | 1.000 | 0.882 | 0.248 | 0.222 | 0.413 | 0.539 | 0.267 |
| 2 | 46598025 | C | G | 1.000 | 0.855 | 0.000 | 0.008 | 0.002 | 0.000 | 0.000 |
| 2 | 46598233 | A | G | 1.000 | 0.974 | 0.889 | 0.803 | 0.609 | 0.512 | 0.771 |
| 2 | 46599373 | A | C | 1.000 | 0.974 | 0.839 | 0.813 | 0.636 | 0.474 | 0.732 |
| 2 | 46600226 | T | G | 1.000 | 0.000 | 0.365 | 0.000 | 0.003 | 0.067 | 0.088 |
| 2 | 46600661 | A | C | 1.000 | 0.842 | 0.107 | 0.008 | 0.002 | 0.000 | 0.010 |

457  
458  
459  
460  
461  
462  
463  
464  
465  
466  
467  
468  
469  
470  
471  
472  
473  
474  
475  
476  
477  
478  
479  
480  
481  
482  
483  
484  
485

*This table shows the Denisovan-like allele frequency distribution in Tibetans and 1000 Genomes super-populations (AFR = Africans; EAS = East Asians; EUR = Europeans; SAS = South Asians; AMR = Americans). We define Denisovan-like alleles being the genomic positions where the Altai Denisovan carries the derived allele in homozygous state. We show that Tibetans have high frequencies (>0.8) in the vast majority of the alleles, while the worldwide populations all carry a small proportion of the Denisovan alleles, they are mostly in low frequencies.*

486  
487  
488

**Table S5: SPrime-inferred archaic introgressed segments that overlap with sequenced regions of HAA-related genes (YRI as outgroup)**

| Chromosome | Position Range (Hg19) | Target Gene | Overlapping Genes                                                                                                                                                                                                                                                                                        | Location to the Target Gene | Segment Label | Match Rate with Altai Neanderthal (%) | Match Rate with Altai Denisovan (%) |
|------------|-----------------------|-------------|----------------------------------------------------------------------------------------------------------------------------------------------------------------------------------------------------------------------------------------------------------------------------------------------------------|-----------------------------|---------------|---------------------------------------|-------------------------------------|
| 1          | 231739562-231873278   | EGLN1       | <b>DISC1</b> , <i>LINC00582</i> , <i>TSNAX-DISC1</i>                                                                                                                                                                                                                                                     | Downstream                  | EGLN1-dA      | 75.86                                 | 24.14                               |
| 2          | 46298751-46458516     | EPAS1       | <b>PRKCE</b>                                                                                                                                                                                                                                                                                             | Upstream                    | EPAS1-uA      | 13.51                                 | 83.78                               |
| 2          | 46657114-46808047     | EPAS1       | <b>TMEM247</b> , <b>ATP6V1E2</b> , <b>RHOQ</b> , <i>RP11-417F21.1</i>                                                                                                                                                                                                                                    | Downstream                  | EPAS1-dA      | 22.53                                 | 46.48                               |
| 9          | 119023930-119113818   | PAPPA       | --                                                                                                                                                                                                                                                                                                       | Core                        | PAPPA-cA      | 82.14                                 | 28.57                               |
| 9          | 119137972-119470221   | PAPPA       | <b>ASTN2</b> , <b>TRIM32</b> , <b>AL137024.1</b>                                                                                                                                                                                                                                                         | Downstream                  | PAPPA-dA      | 48.31                                 | 14.41                               |
| 12         | 33736191-34854345     | SYT10       | <b>ALG10</b> , <i>RP13-359K18.1</i>                                                                                                                                                                                                                                                                      | Downstream                  | SYT10-dA      | 76.18                                 | 4.22                                |
| 12         | 52432776-52626674     | ACVRL1      | <b>NR4A1</b> , <b>OR7E47P</b> , <b>ATG101</b> , <i>RP11-1100L3.7</i> , <b>KRT80</b>                                                                                                                                                                                                                      | Downstream                  | ACVRL1-dA     | 75.81                                 | 9.68                                |
| 16         | 89659406-90188467     | FANCA       | <b>CPNE7</b> , <b>CDK10</b> , <b>DPEP1</b> , <b>CHMP1A</b> , <b>SPATA2L</b> , <b>SPIRE2</b> , <b>MC1R</b> , <b>TCF25</b> , <b>CENPBBD1</b> , <b>DBNDD1</b> , <b>SPATA33</b> , <b>AC092143.1</b> , <i>VPS9D1-AS1</i> , <b>ZNF276</b> , <b>DEF8</b> , <b>TUBB3</b> , <i>RP11-566K11.5</i> , <i>AFG3L1P</i> | Upstream, Core, Downstream  | FANCA-cA      | 76.68                                 | 51.21                               |
| 22         | 46408289-46480570     | PPARA       | <i>CITF22-92A6.1</i> , <i>LINC00899</i> , <b>PRR34</b> , <i>RP6-109B7.5</i> , <i>PRR34-AS1</i> , <i>RP6-109B7.2</i> , <i>RP6-109B7.4</i> , <b>MIRLET7BHG</b>                                                                                                                                             | Upstream                    | PPARA-uA      | 9.09                                  | 70.45                               |

489  
490  
491  
492  
493  
494  
495  
496  
497  
498  
499  
500  
501  
502  
503  
504  
505  
506  
507  
508

The above table shows the Denisovan introgressed segments in Tibetans that overlap with high altitude adaptation (HAA) candidate gene regions (segments inferred by SPrime). Each row represents a unique segment. From left to the right, each column denotes the chromosome of the segment, the genomic coordinate ranges (hg19), the nearby core HAA gene, other overlapped genes (protein-coding genes in bold), the relative location to the nearby HAA gene, the label of the segment (with "-u/c/d" corresponding to upstream, core, and downstream, and "A" corresponding to SPrime outgroup being Yorubans), match rate to Altai Neanderthal, and match rate to Altai Denisovan.

509 **Table S6: Significant high scoring biological pathways ranked by subnetwork score ( $p$ -value**  
 510 **< 0.05)**  
 511

| Pathway                            | Network size | Subnetwork size | Subnetwork score | $p$ -value  | Subnetwork genes                  |
|------------------------------------|--------------|-----------------|------------------|-------------|-----------------------------------|
| p73 transcription factor network   | 76           | 5               | 10.29656462      | 0.018240343 | <i>BUB3 CLCA2 SIRT1 TP73 WWOX</i> |
| TNF receptor signaling pathway     | 34           | 3               | 10.08066121      | 0.019313305 | <i>MAP2K3 TRADD TXN</i>           |
| p38 MAPK signaling pathway         | 22           | 3               | 10.08066121      | 0.019313305 | <i>MAP2K3 MAP3K5 TXN</i>          |
| Insulin Pathway                    | 42           | 2               | 8.891866245      | 0.0472103   | <i>F2RL2 RHOQ</i>                 |
| Insulin-mediated glucose transport | 17           | 2               | 8.891866245      | 0.0472103   | <i>RHOQ VAMP2</i>                 |

512  
 513 *This table shows the biological pathways (NCI database) that are significant ( $p$ -value < 0.05) for being*  
 514 *enriched with archaic introgressed alleles and are under positive selection in Tibetan population. The*  
 515 *archaic alleles used in this analysis include all diagnostic SNPs identified from SPrime. Each row in this*  
 516 *table represents a pathway, and each column from left to right represents the pathway's name, the*  
 517 *total number of genes included in the pathway (network size), the number of genes involved in positive*  
 518 *selection for archaic alleles (subnetwork size), the score assigned from the high scoring subnetwork*  
 519 *(HSS) analysis, the  $p$ -value of the pathway, and the names of the genes that are under positive selection*  
 520 *(subnetwork genes, total number corresponding to the subnetwork size).*

521  
 522  
 523 **Table S7: Time Estimates on Denisovan admixture, Tibetan-Han Chinese Divergence, and**  
 524 ***EPAS1* selection from this and other studies.**  
 525

| Date (ka)                                                                 |                             | Summary Statistics/Methods                      | Type of Data                          | Reference                    |
|---------------------------------------------------------------------------|-----------------------------|-------------------------------------------------|---------------------------------------|------------------------------|
| Denisovan Admixture Time in Asia                                          | <i>EPAS1</i> Selection Time |                                                 |                                       |                              |
| 48.76<br>[59.50-15.99]<br><i>*estimate for introgression in East Asia</i> | 8.93<br>[42.56-2.50]        | Distribution of introgressed tract length /ABC  | <i>EPAS1</i> gene sequence (Tibetans) | This study                   |
| 45.7<br>(31.9-60.7)<br><i>*Shared with Papuans</i>                        | -                           | Distribution of tract length/Maximum likelihood | Whole genome sequence (Papuans)       | Jacobs <i>et al.</i> 2019(7) |



|       |                                                                         |                                                                          |                                                  |                                       |
|-------|-------------------------------------------------------------------------|--------------------------------------------------------------------------|--------------------------------------------------|---------------------------------------|
| 32-12 | 12.30<br>(28-7)                                                         | Allele frequency,<br>haplotype<br>homozygosity/<br>Maximum<br>likelihood | Whole genome<br>sequence<br>(Tibetans)           | Hu <i>et al.</i><br>2017(8)           |
| 62-38 | -                                                                       | Pairwise nucleotide<br>difference/TMRCA                                  | Whole genome<br>sequence<br>(Tibetans)           | Lu <i>et al.</i><br>2016(4)           |
| 44-54 | -                                                                       | Decay of linkage<br>disequilibrium/<br>Maximum<br>likelihood             | Whole genome<br>sequence<br>(Papuan)             | Sankararaman<br><i>et al.</i> 2016(9) |
| -     | 12.80<br>(12.07–14.73)<br><i>*selection not on<br/>Denisovan allele</i> | Extended haplotype<br>homozygosity                                       | Microarray<br>data of <i>EPAS1</i><br>(Tibetans) | Lou <i>et al.</i><br>2015(10)         |
| -     | 18.25<br>(17.57-18.93)                                                  | Extended haplotype<br>homozygosity                                       | Re-sequencing<br>of <i>EPAS1</i><br>(Tibetans)   | Peng <i>et al.</i><br>2010(11)        |

526

527

528

529

530

531

532

533

534

535

536

537

*In this table, 95% confidence intervals (CI) estimated from previous studies are shown in the parentheses. 95% credible intervals estimated from ABC in this study are shown in brackets. Lu et al. 2016 estimated the Time to the Most Recent Common Ancestor (TMRCA) as a proxy of admixture time, assuming the Denisovan and Tibetan lineages coalesce right before the introgression time. Jacobs et al. 2019 inferred 3 pulses of Denisovan admixture in Asia, with one introgressed into the Papuan lineage at 29.8 ka (95% CI 14.4–50.4), and one into the shared lineage of Papuans and other Asians at 45.7 ka (95% CI 31.9–60.7) respectively. That work did not provide an estimate on the East Asian-specific introgression time.*

535

536

537

## Reference

538

539

540

541

542

543

544

545

546

547

548

- Durand EY, Patterson N, Reich D, Slatkin M (2011) Testing for ancient admixture between closely related populations. *Mol Biol Evol* 28(8):2239–2252.
- Haller BC, Messer PW (2018) SLiM 3: Forward genetic simulations beyond the Wright–Fisher model. *Mol Biol Evol*:msy228–msy228.
- Gravel S, et al. (2011) Demographic history and rare allele sharing among human populations. *Proc Natl Acad Sci* 108(29):11983 LP-11988.
- Lu D, et al. (2016) Ancestral Origins and Genetic History of Tibetan Highlanders. *Am J Hum Genet* 99(3):580–594.
- Browning SR, Browning BL, Zhou Y, Tucci S, Akey JM (2018) Analysis of Human Sequence Data Reveals Two Pulses of Archaic Denisovan Admixture. *Cell* 173(1):53–61.e9.
- Marnetto D, Huerta-Sánchez E (2017) Haplostrips: revealing population structure through

549 haplotype visualization. *Methods Ecol Evol* 8(10):1389–1392.

550 7. Jacobs GS, et al. (2019) Multiple Deeply Divergent Denisovan Ancestries in Papuans. *Cell*  
551 177(4):1010–1021.

552 8. Hu H, et al. (2017) Evolutionary history of Tibetans inferred from whole-genome  
553 sequencing. *PLOS Genet* 13(4):e1006675.

554 9. Sankararaman S, Mallick S, Patterson N, Reich D (2016) The Combined Landscape of  
555 Denisovan and Neanderthal Ancestry in Present-Day Humans. *Curr Biol* 26(9):1241–1247.

556 10. Lou H, et al. (2015) A 3.4-kb Copy-Number Deletion near EPAS1 Is Significantly Enriched in  
557 High-Altitude Tibetans but Absent from the Denisovan Sequence. *Am J Hum Genet* 97(1):54–  
558 66.

559 11. Peng Y, et al. (2010) Genetic Variations in Tibetan Populations and High-Altitude Adaptation  
560 at the Himalayas. *Mol Biol Evol* 28(2):1075–1081.

561

562
